# Supplementary material
Source: PubMed Central journal article supplement (PMC3083453)

**Supplemental Figure 1. MC stabilization prevents serum MC-derived tryptase levels.** MC-derived tryptase was analyzed by ELISA in the serum of septic mice at 2 hours after CLP. The graph depicts the relative percent of the tryptase levels found as compared to the values induced by CLP. (n=4/group; \*p<0.05 vs CLP)

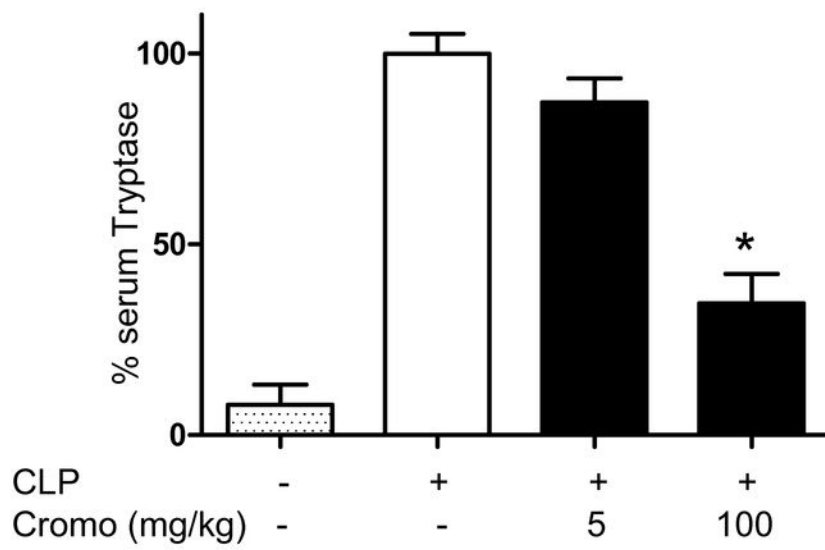

Supplement: NIHMS288883-supplement-Supplementary.pdf [file NIHMS288883-supplement-Supplementary.pdf]
